# Supplementary material
Source: PubMed Central journal article supplement (PMC3970436)

conor 201 1 C:\Bruker\TOPSPIN evans

nitro ethyl etnbs in dmso after column

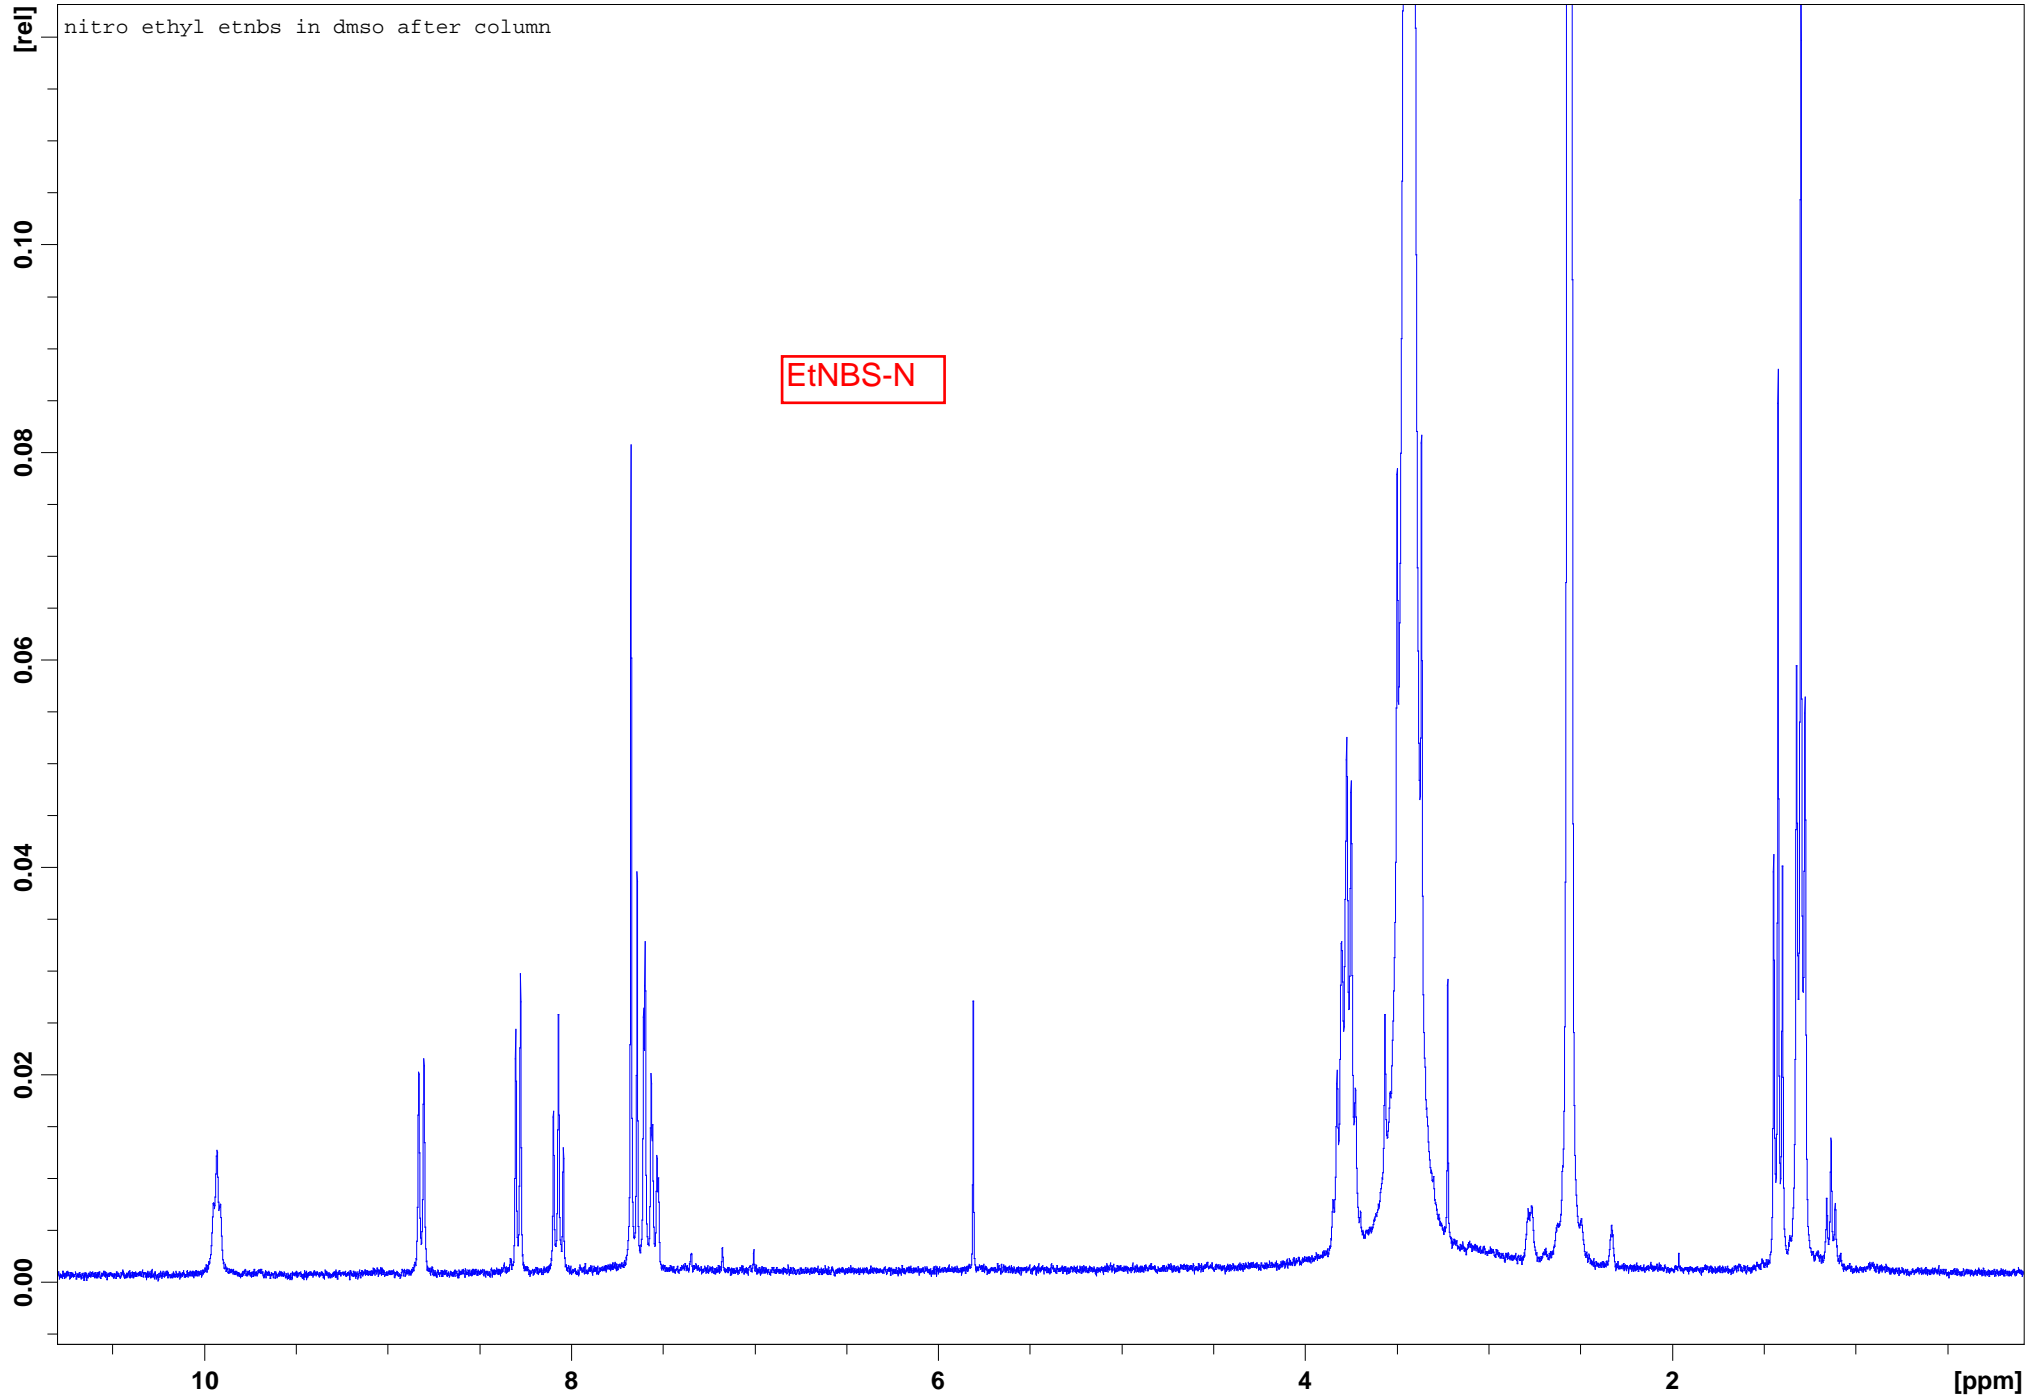

conor 212 1 C:\Bruker\TOPSPIN evans

nh2 etnbs after column/hplc, second fraction

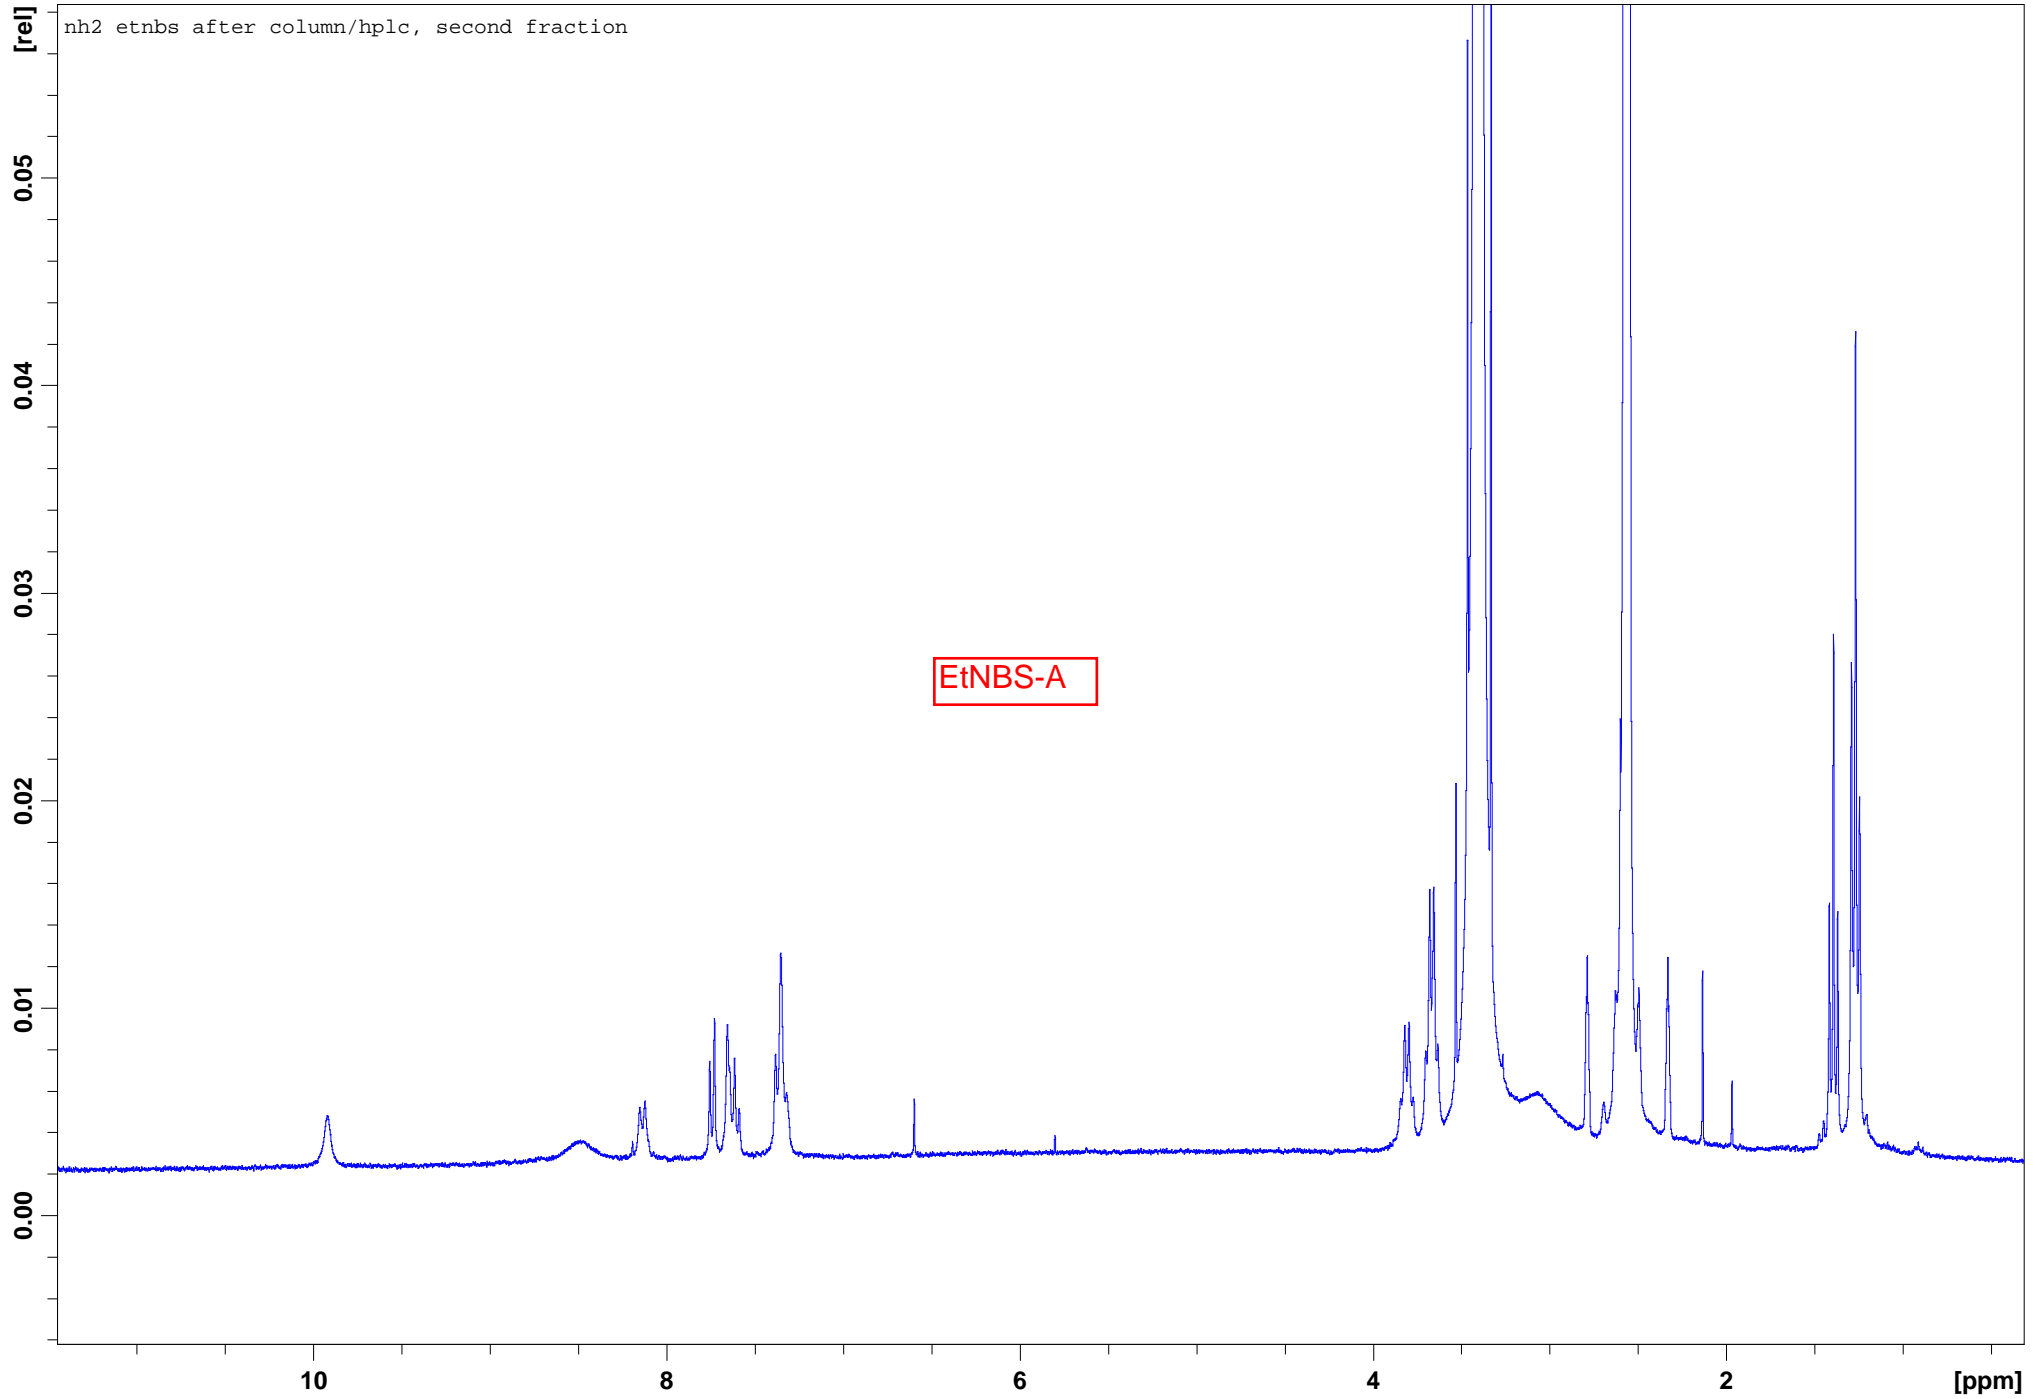

conor 221 1 C:\Bruker\TOPSPIN evans

sulfonamide etnbs after silica gel column and hplc

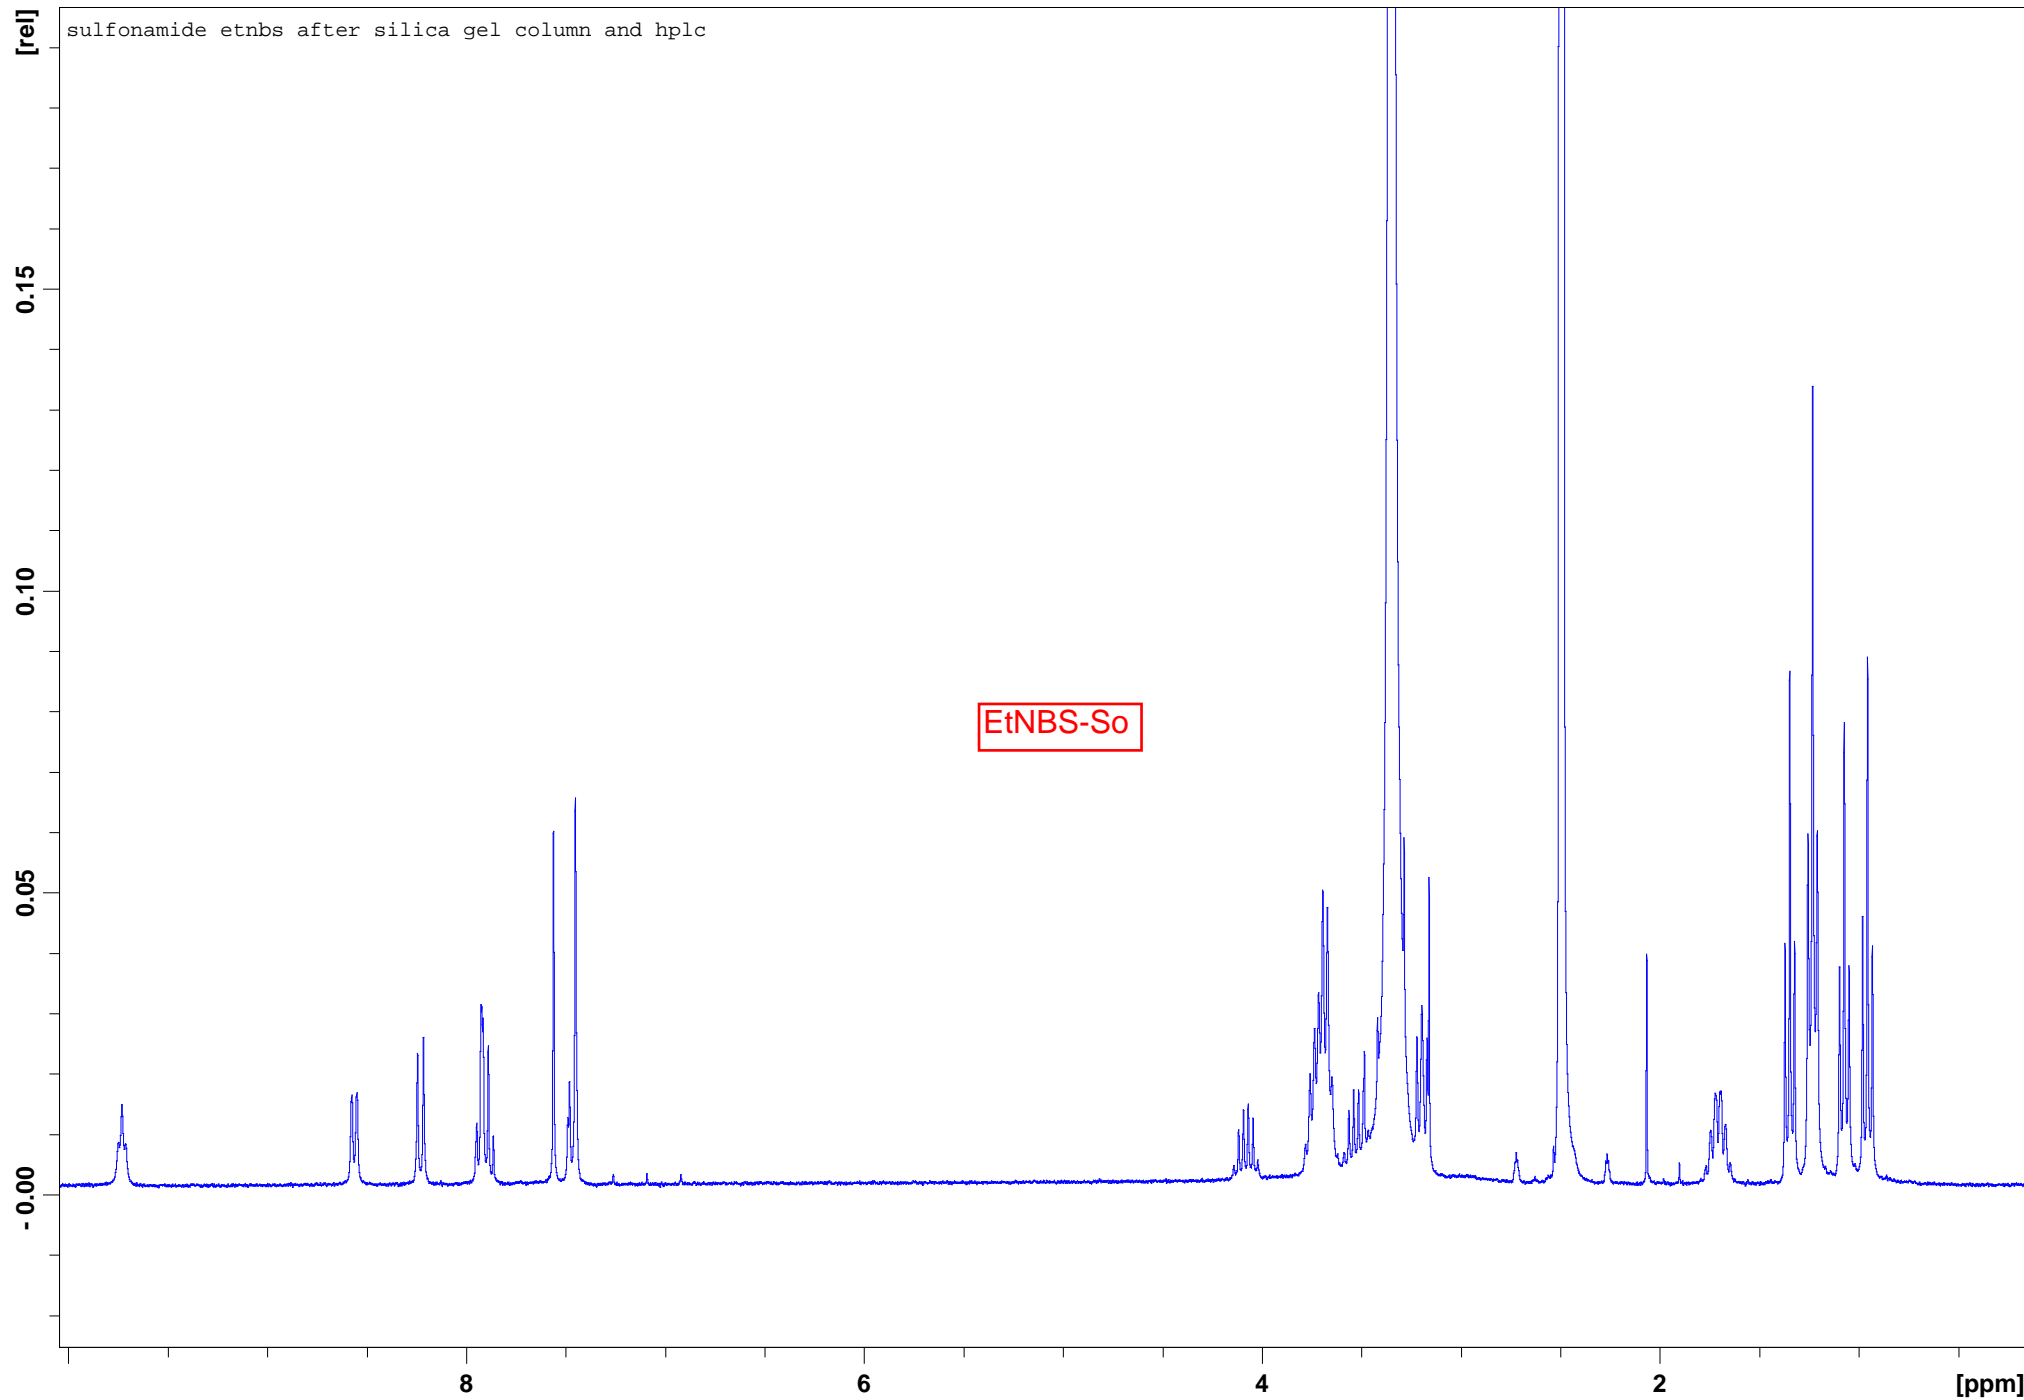

test 182 1 C:\Bruker\TOPSPIN bb

sulfonamide etnbs from proton sponge; after silica column

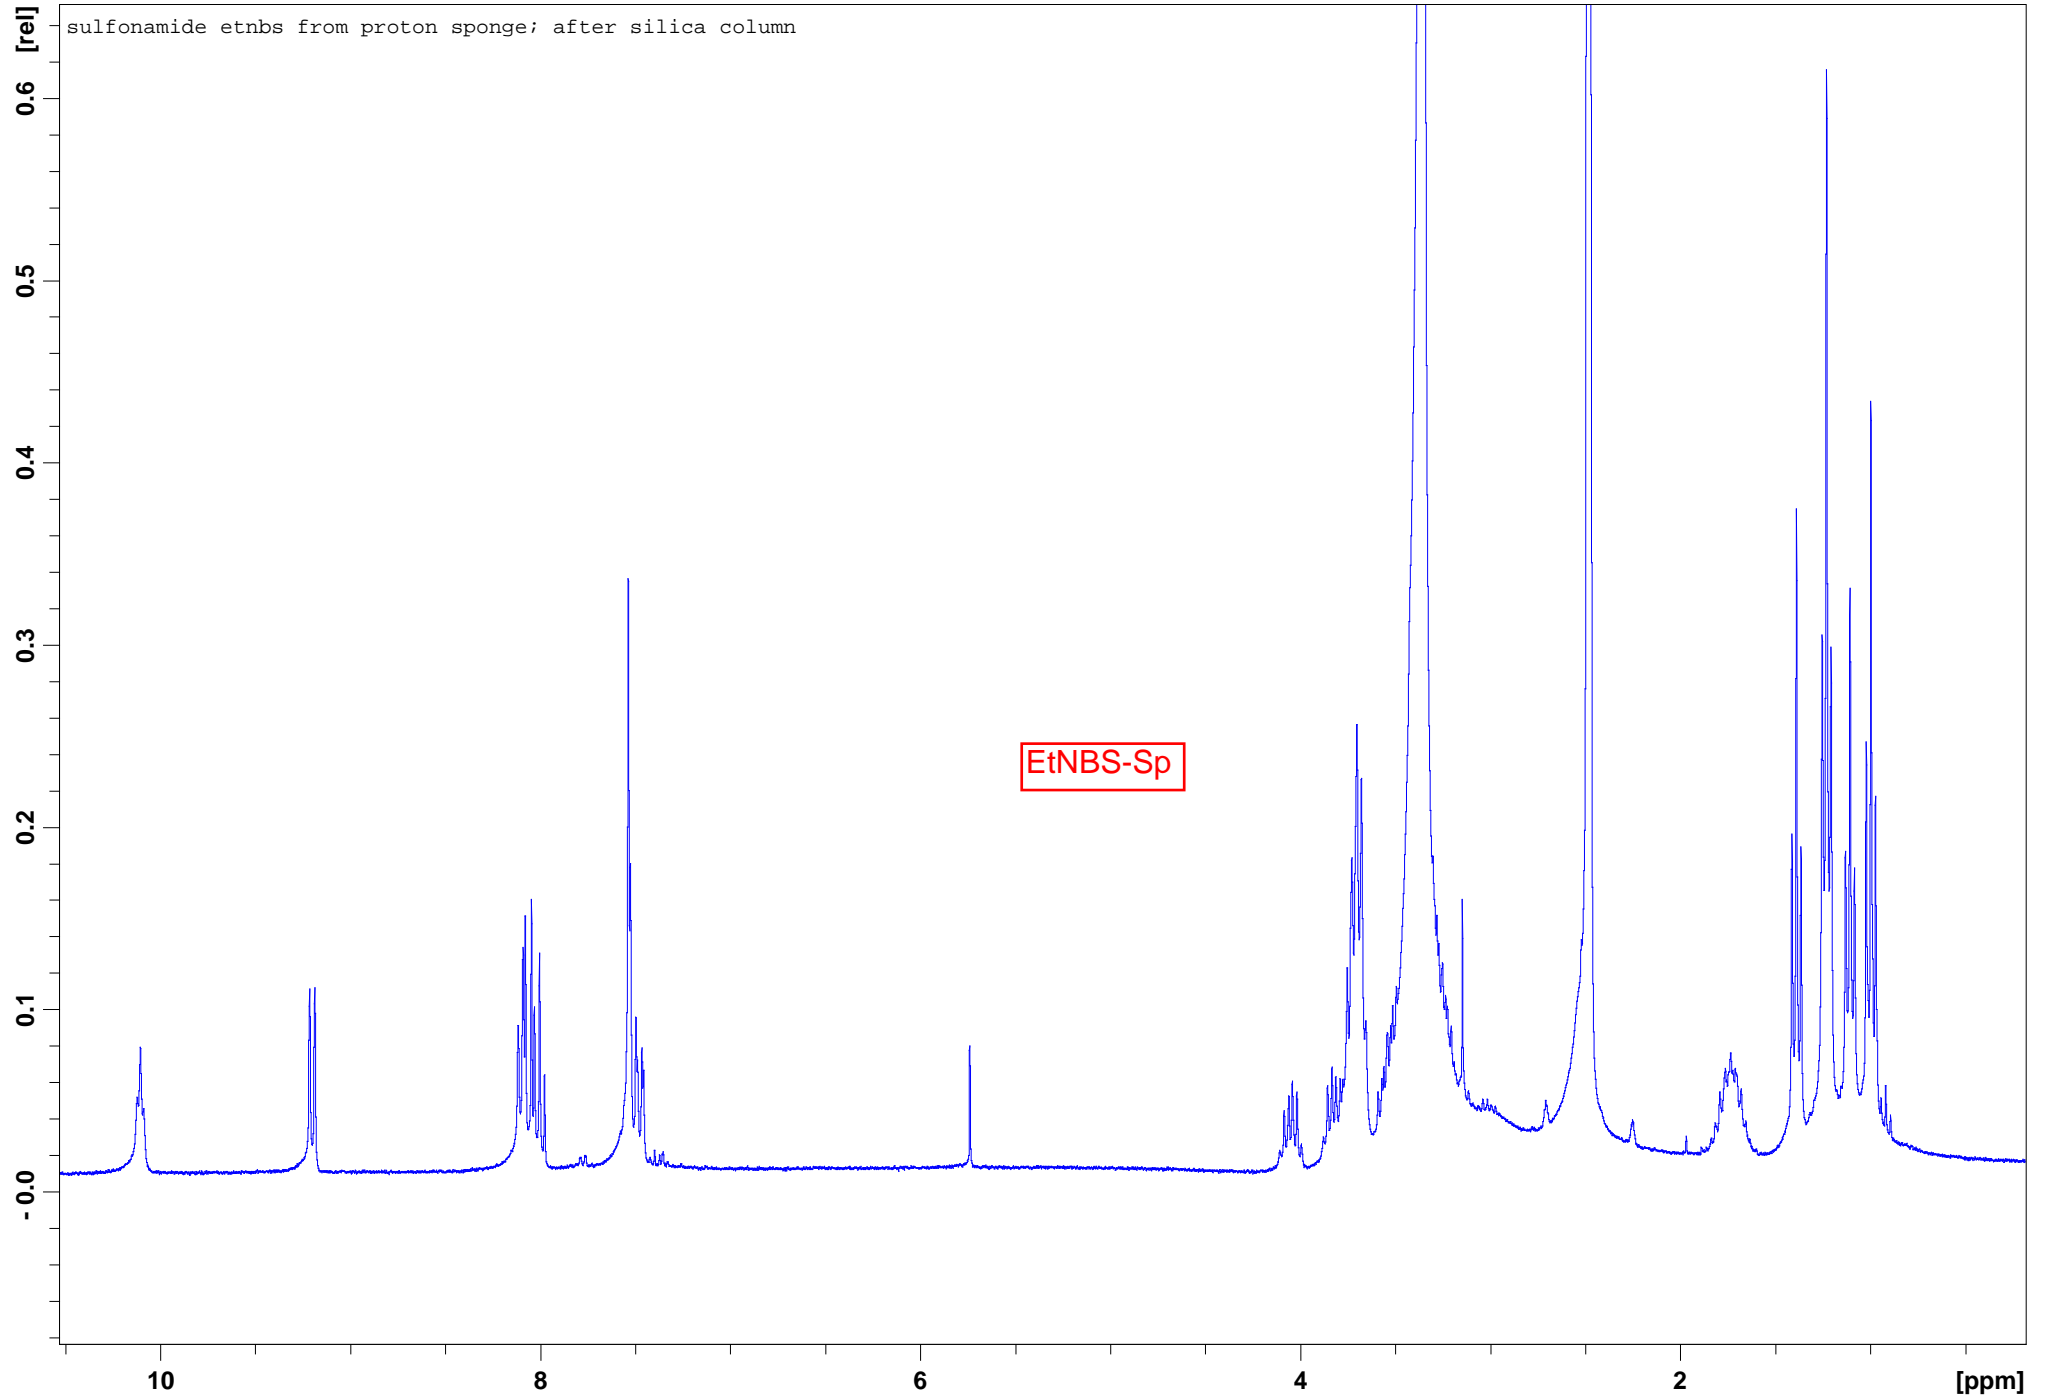

test 191 1 C:\Bruker\TOPSPIN bb

Guanidine ETNBS IN MEOD, hplc pure

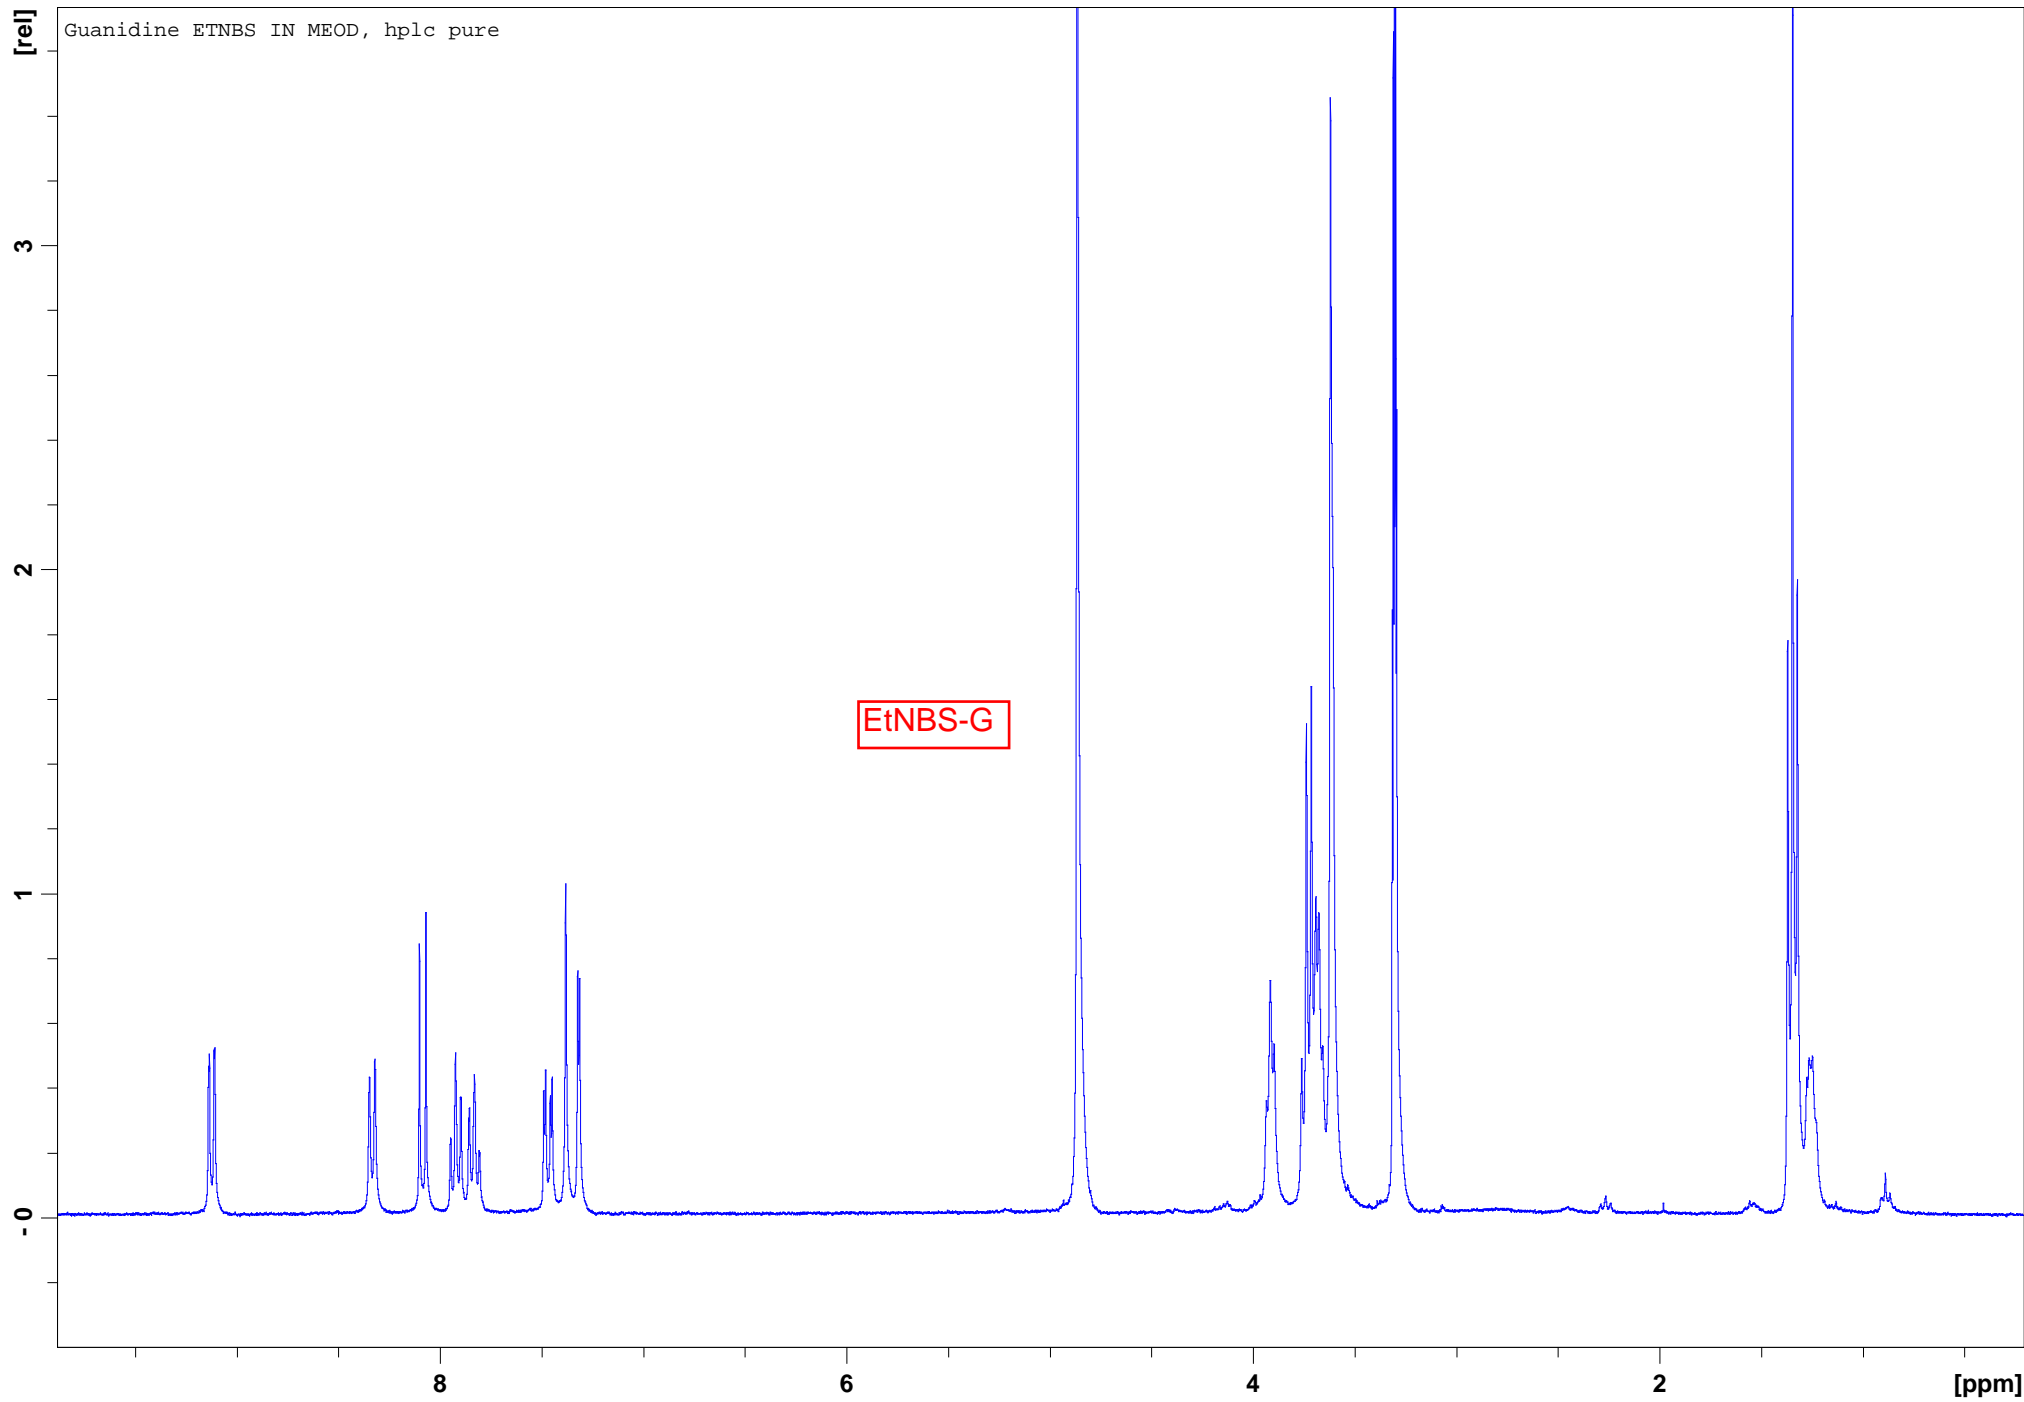

conor 189 1 C:\Bruker\TOPSPIN evans

amide etnbs after column in dms

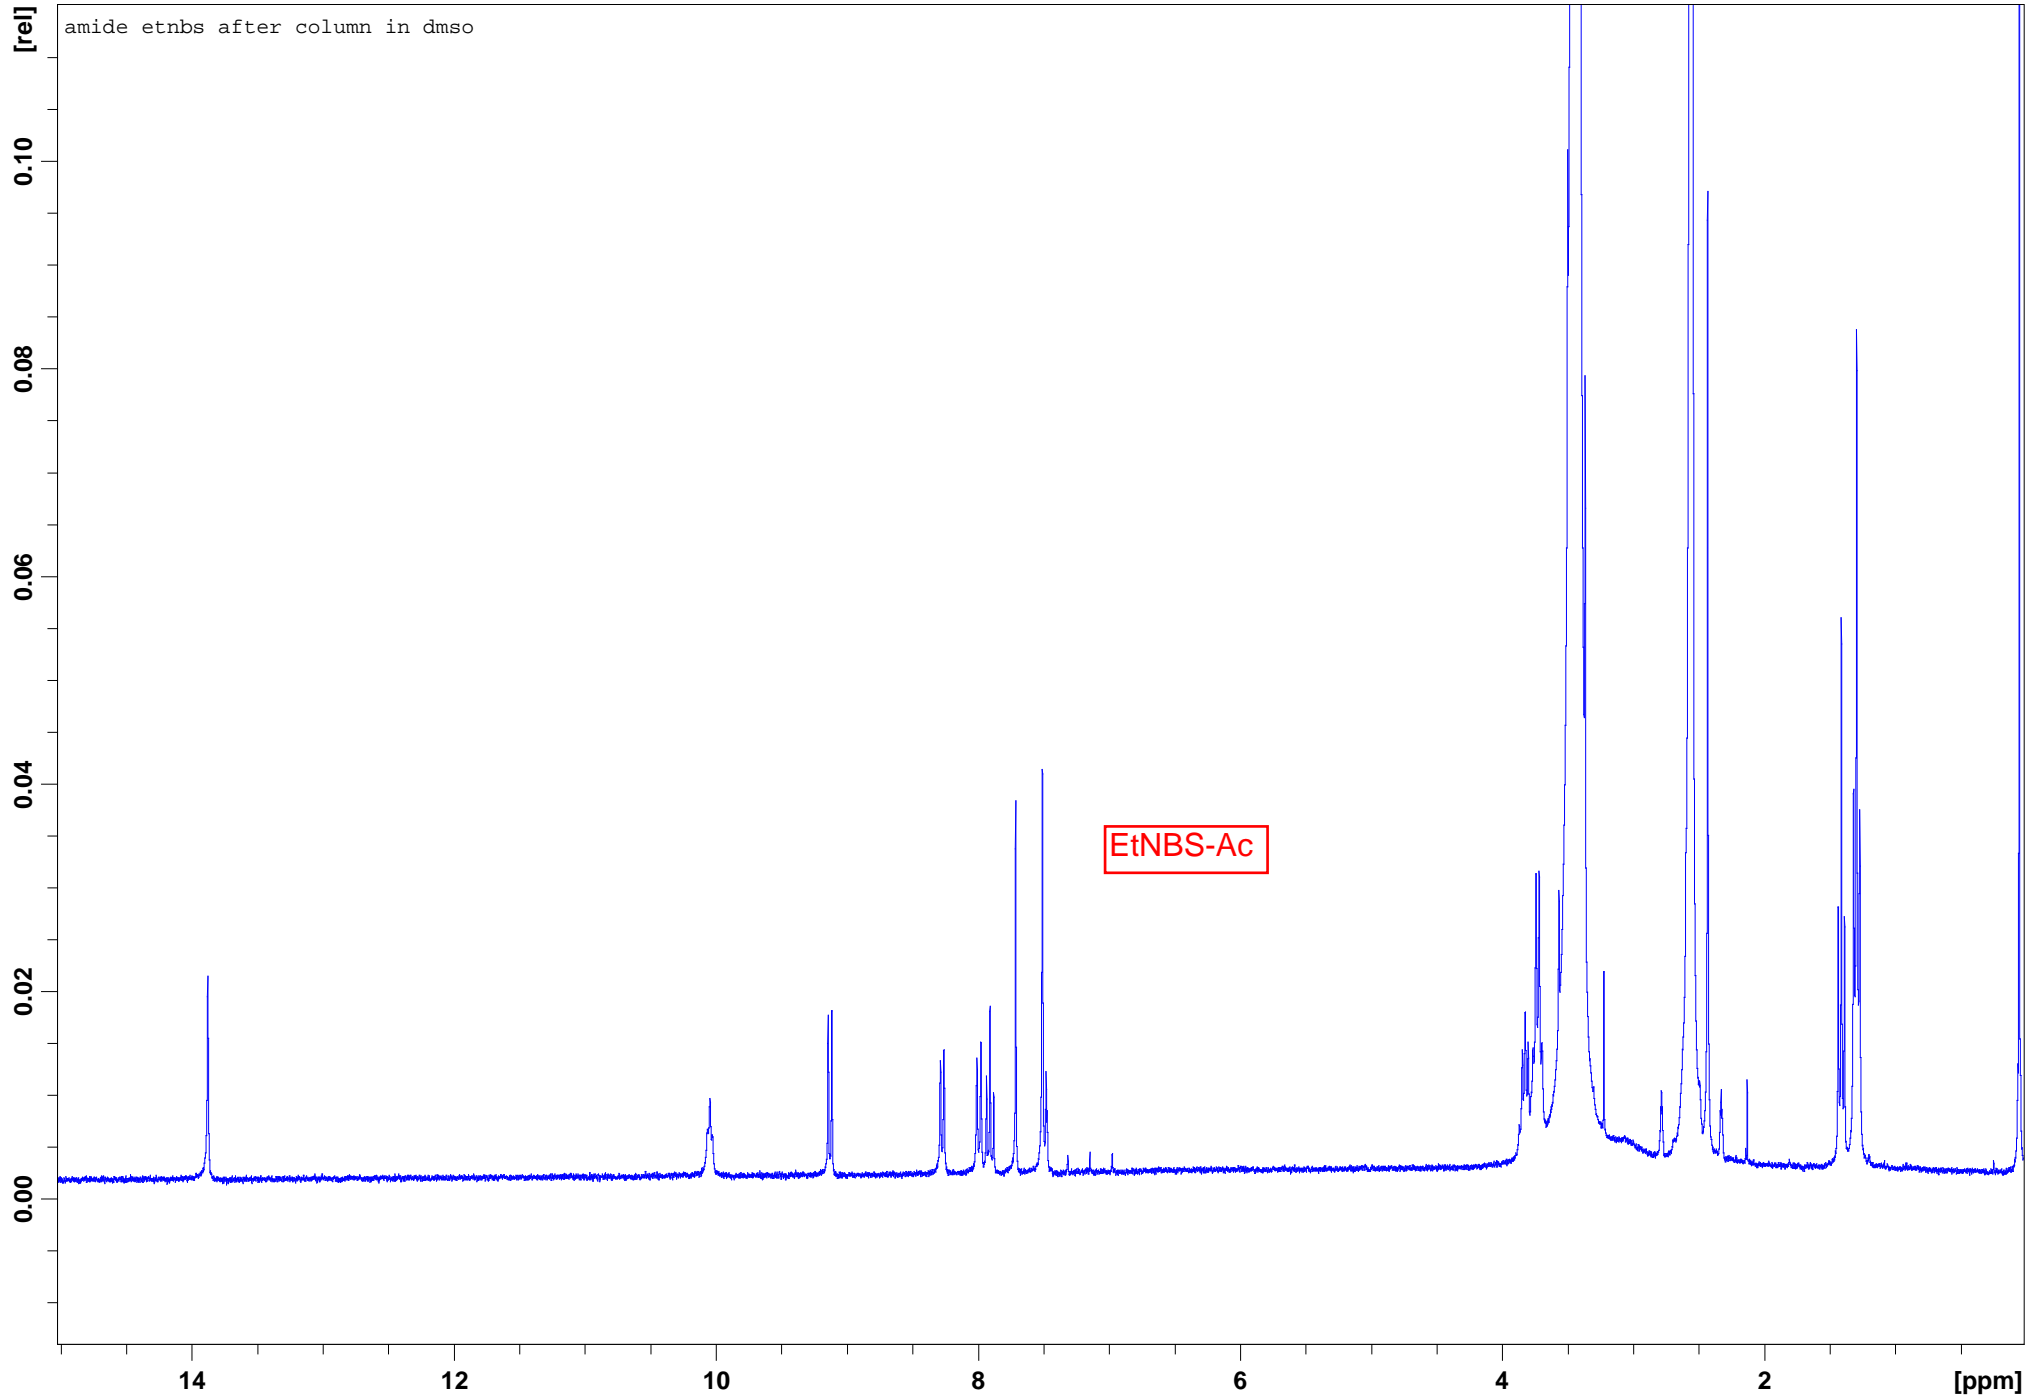

Supplement: NIHMS562533-supplement-03.pdf [file NIHMS562533-supplement-03.pdf]
