# Supplementary material
Source: PubMed Central journal article supplement (PMC3970436)

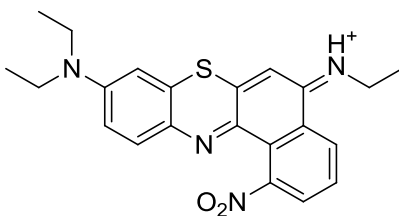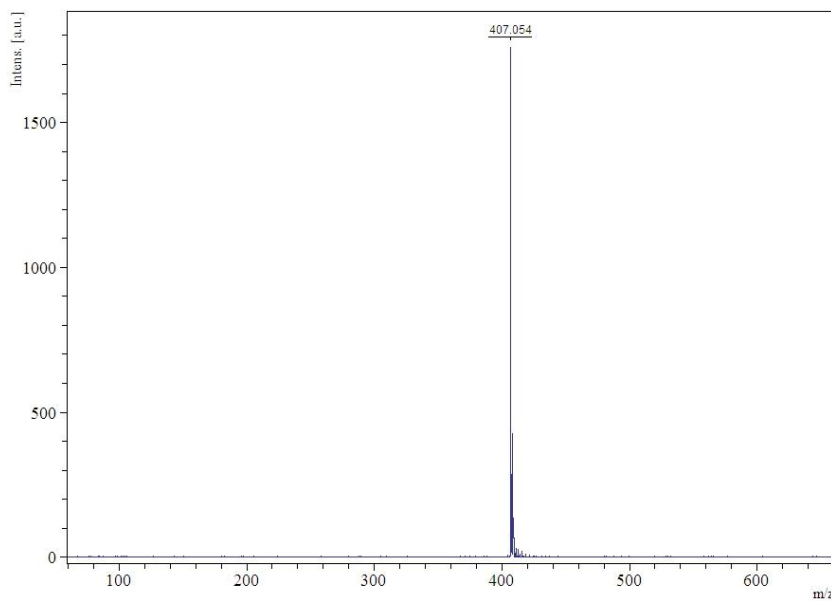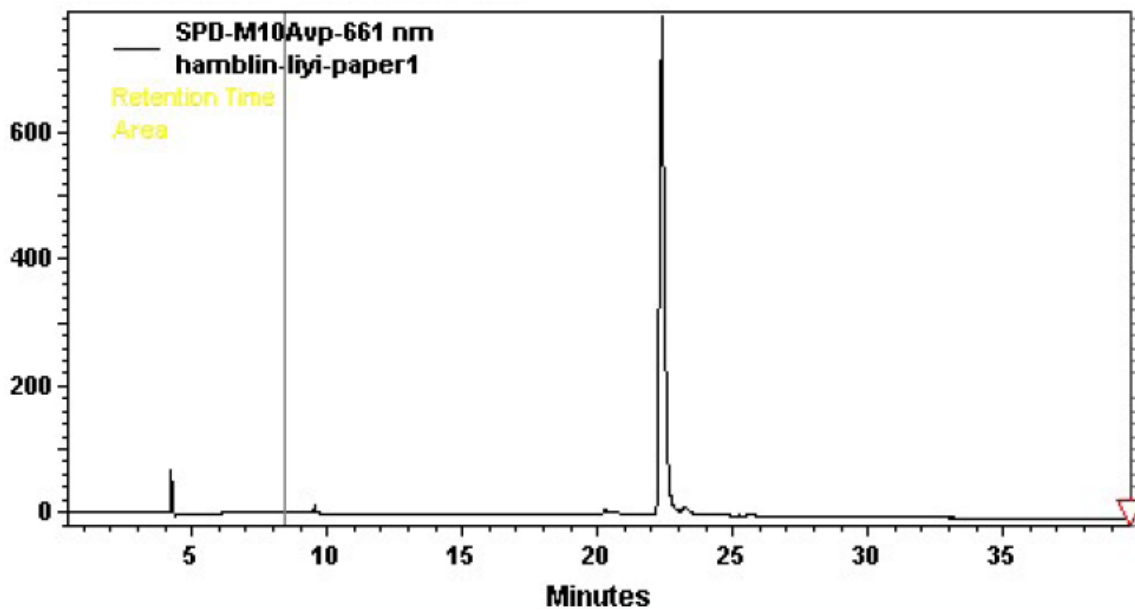

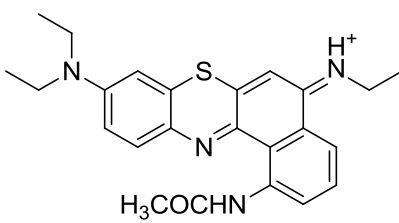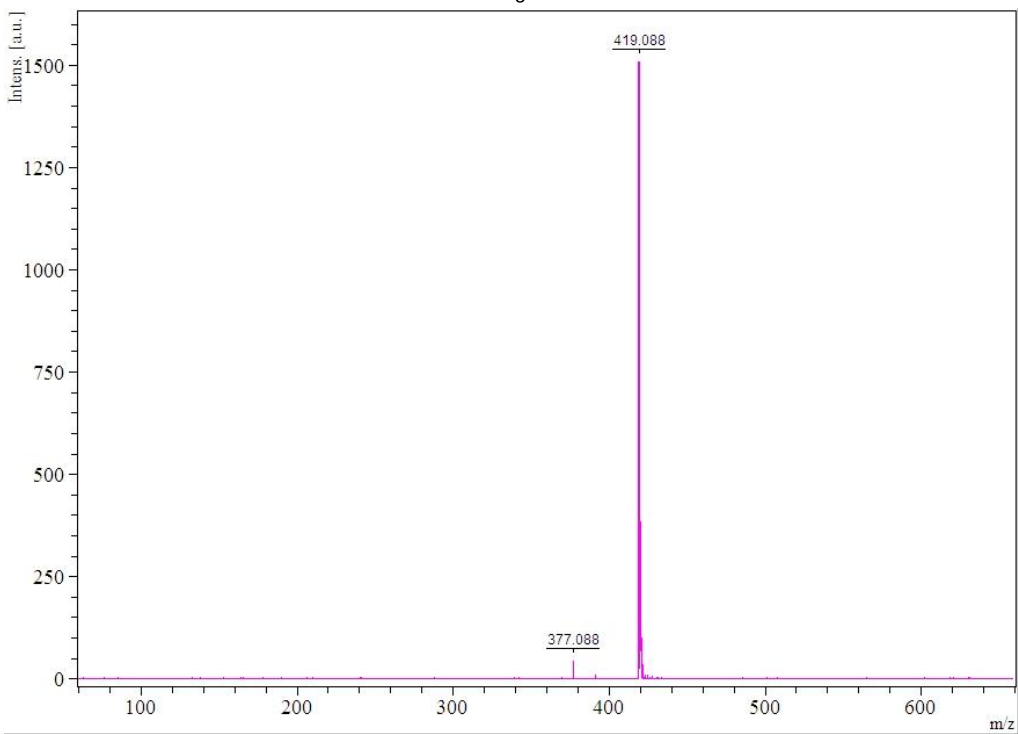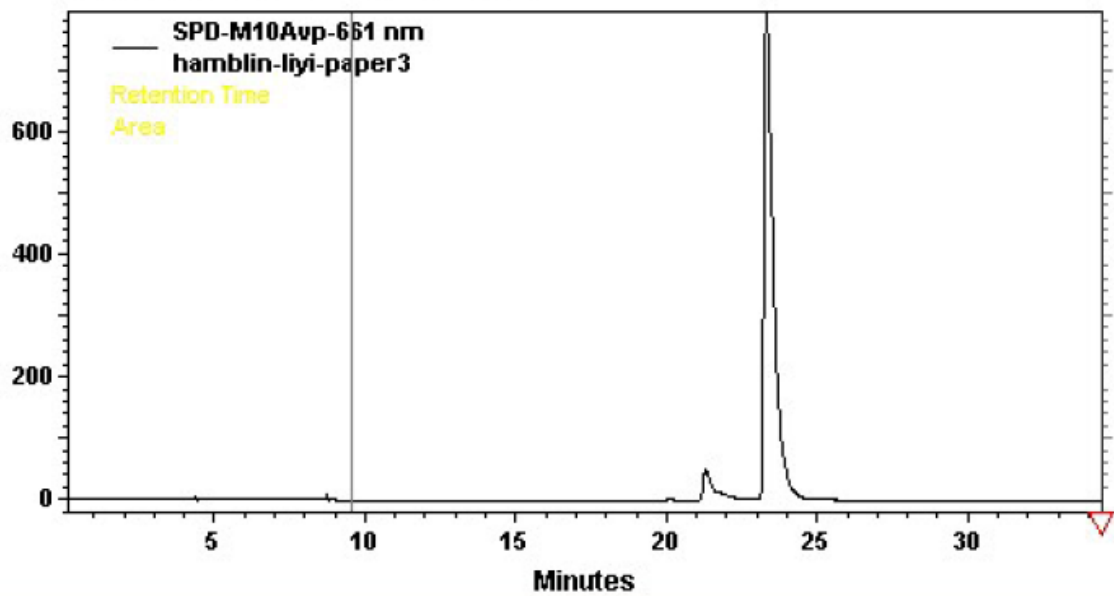

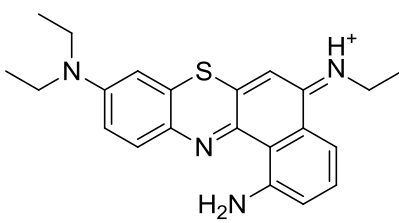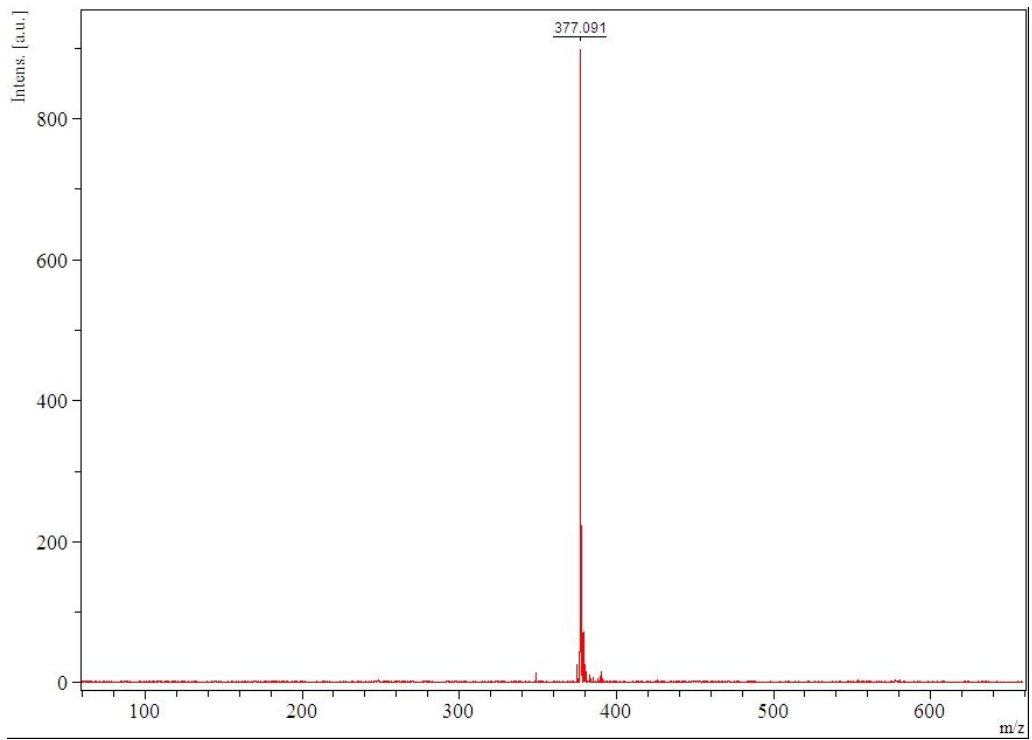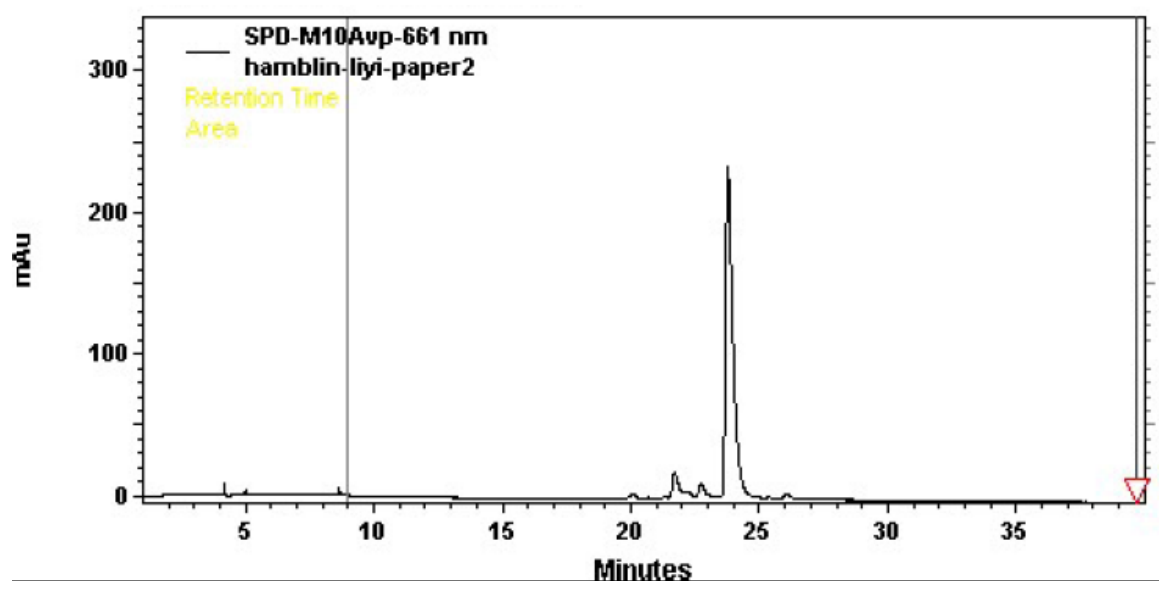

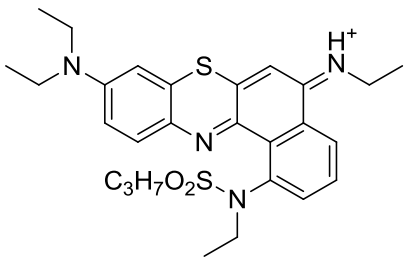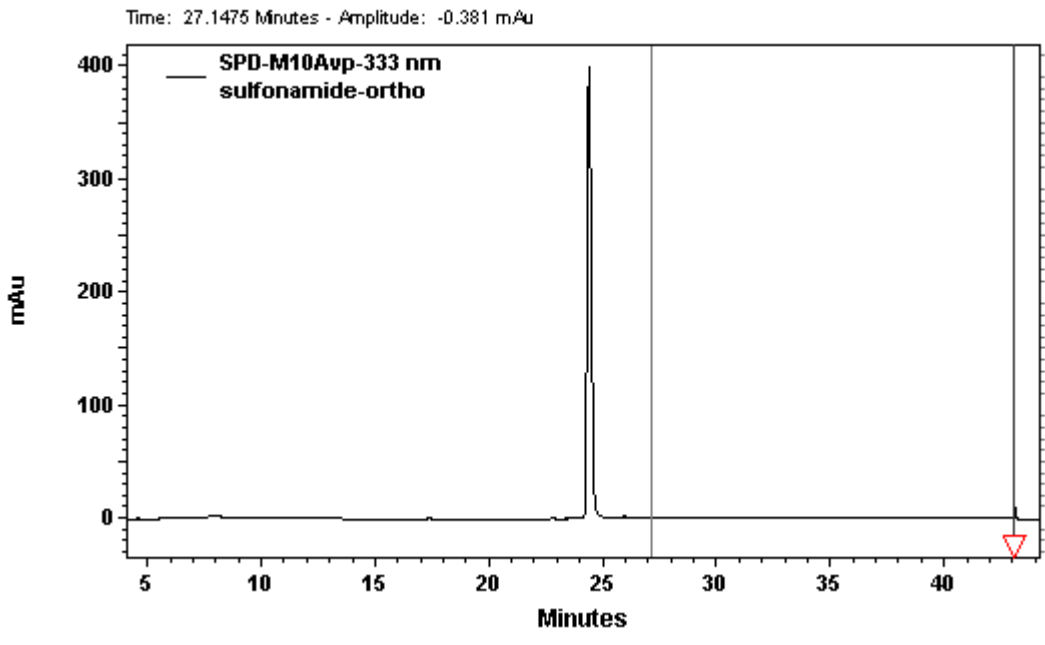

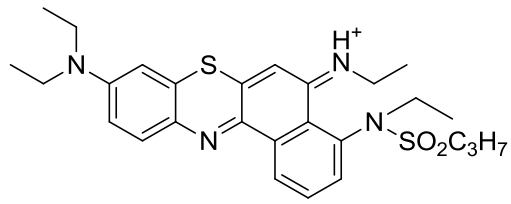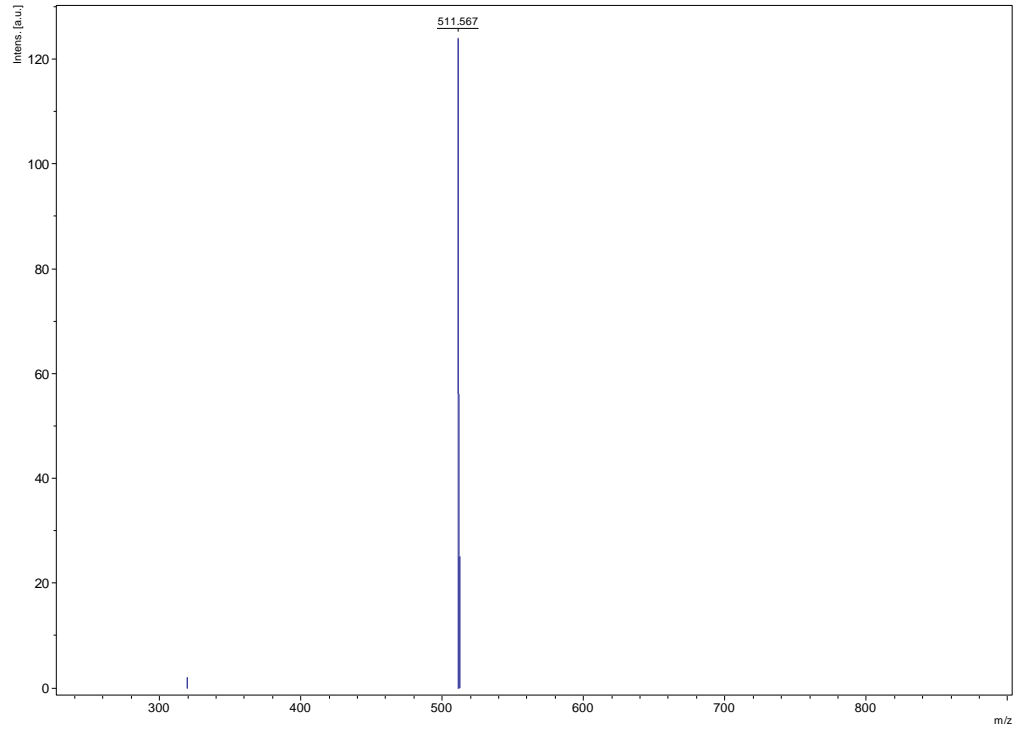

Time: 9.26044 Minutes - Amplitude: -2.917 mAu

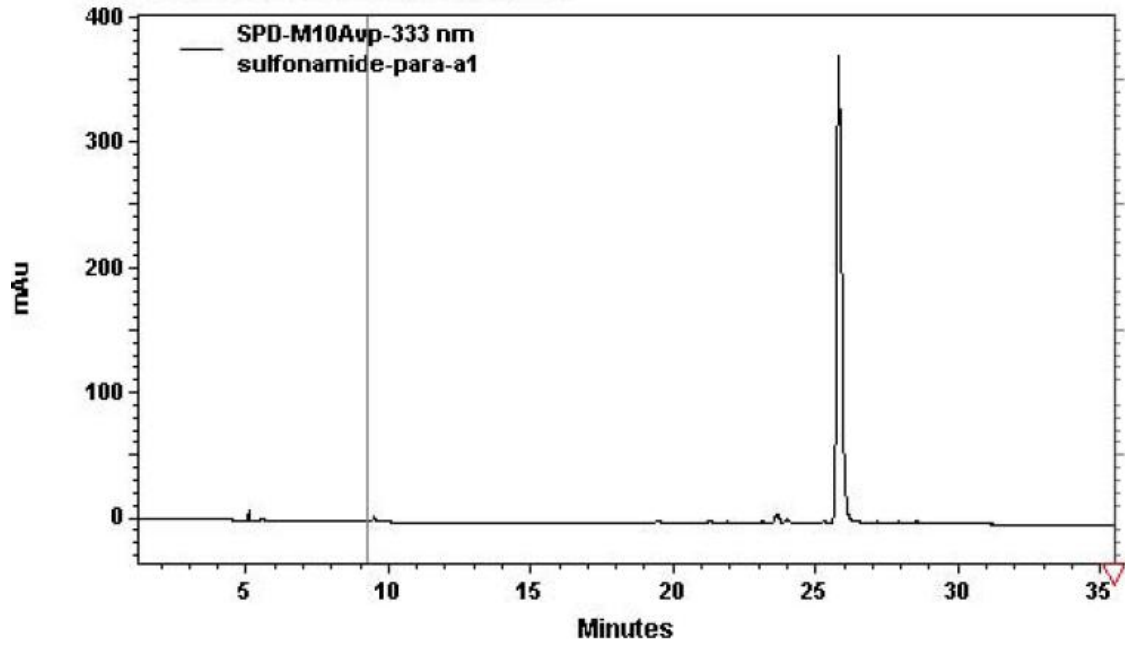

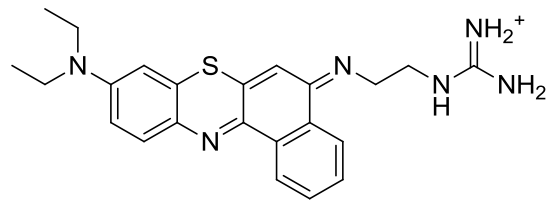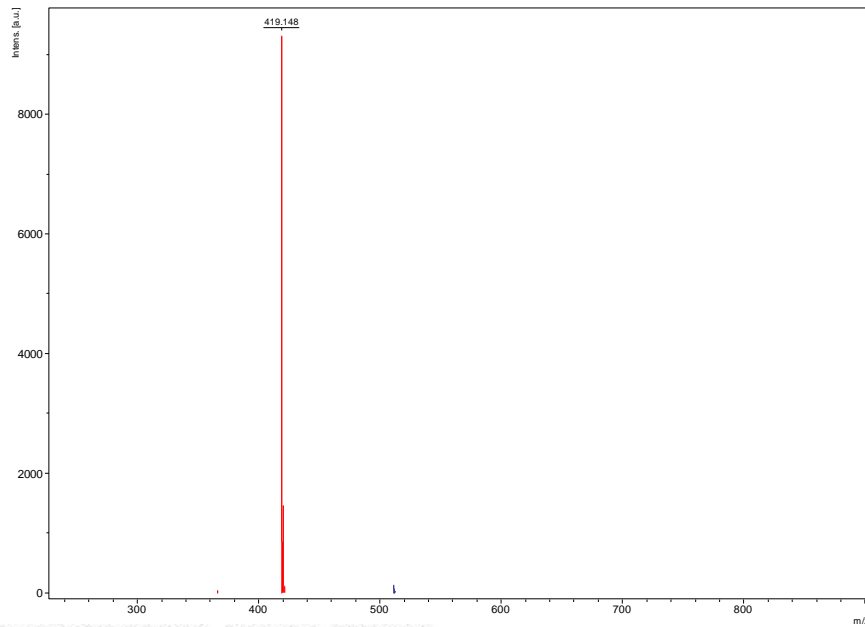

Time: 4.25631 Minutes - Amplitude: 0.013 mAu

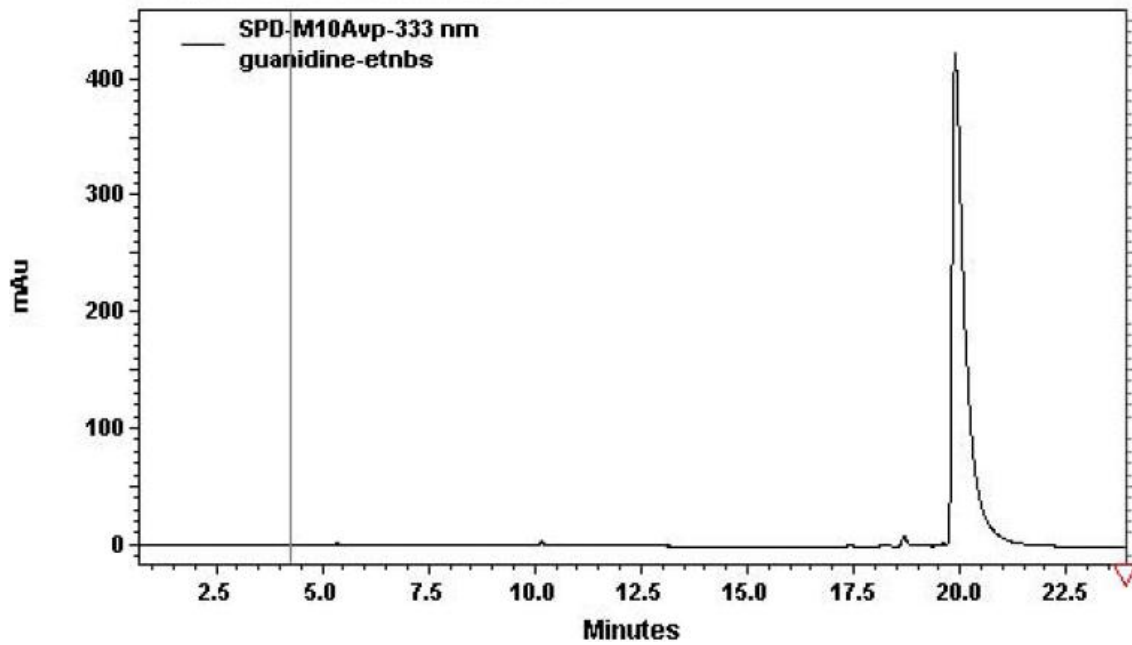

Supplement: NIHMS562533-supplement-02.pdf [file NIHMS562533-supplement-02.pdf]

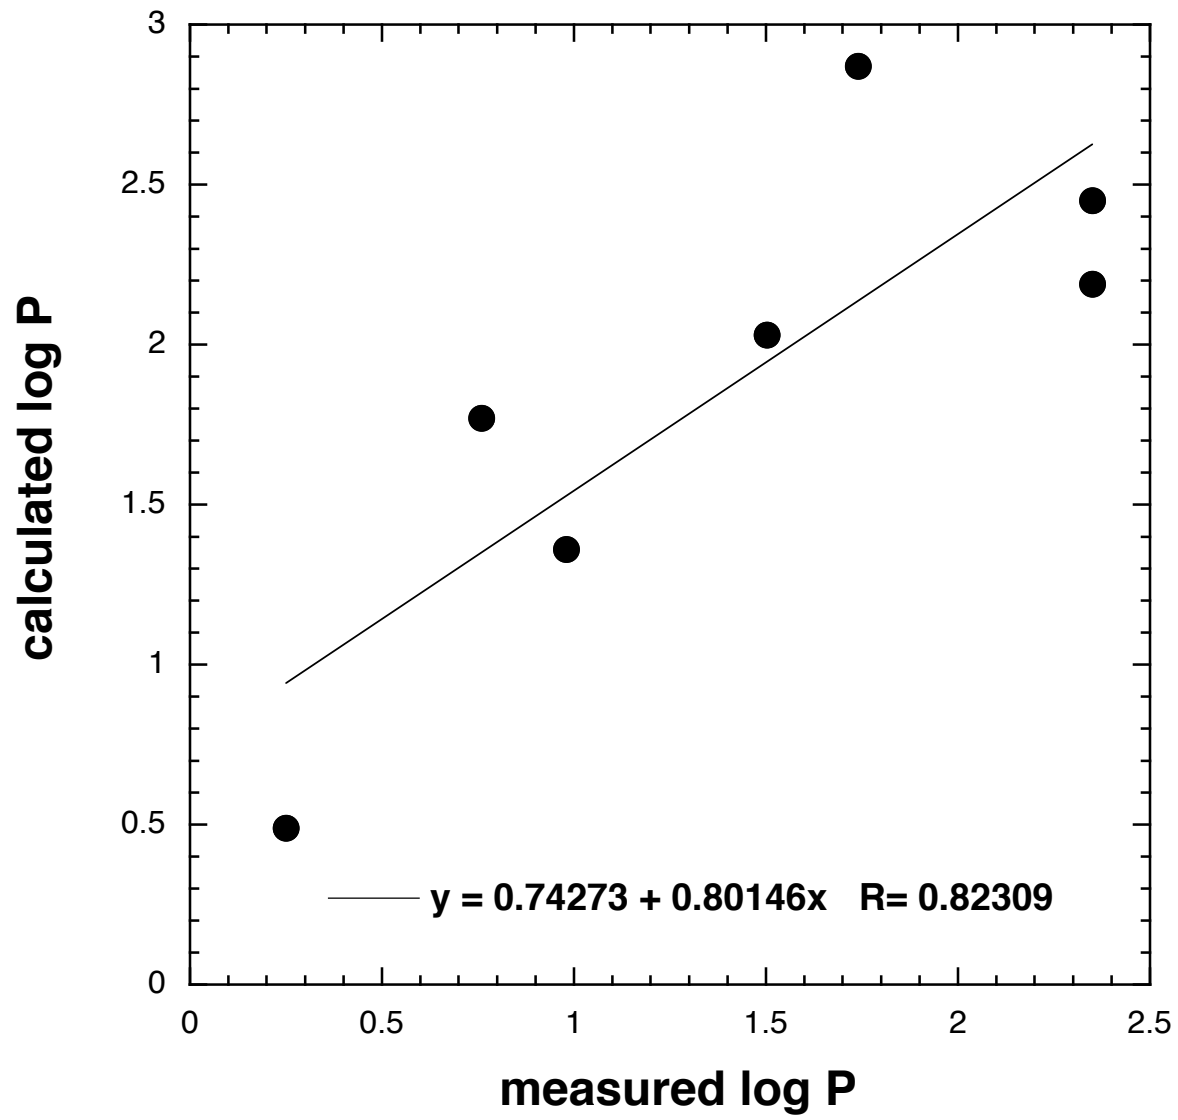

Supplement: NIHMS562533-supplement-04.pdf [file NIHMS562533-supplement-04.pdf]
